# Supplementary material for: Increased oxidative stress during exercise predicts poor prognosis in patients with acute decompensated heart failure
Source: PubMed Central journal article supplement — ESC Heart Fail. 2021 Jul 29;8(5):3885–93. doi: 10.1002/ehf2.13538 (PMC8497195; doi:10.1002/ehf2.13538), 2021-07-29
Supplement: EHF2-8-3885-s001.pdf [file EHF2-8-3885-s001.pdf]

Figure S1

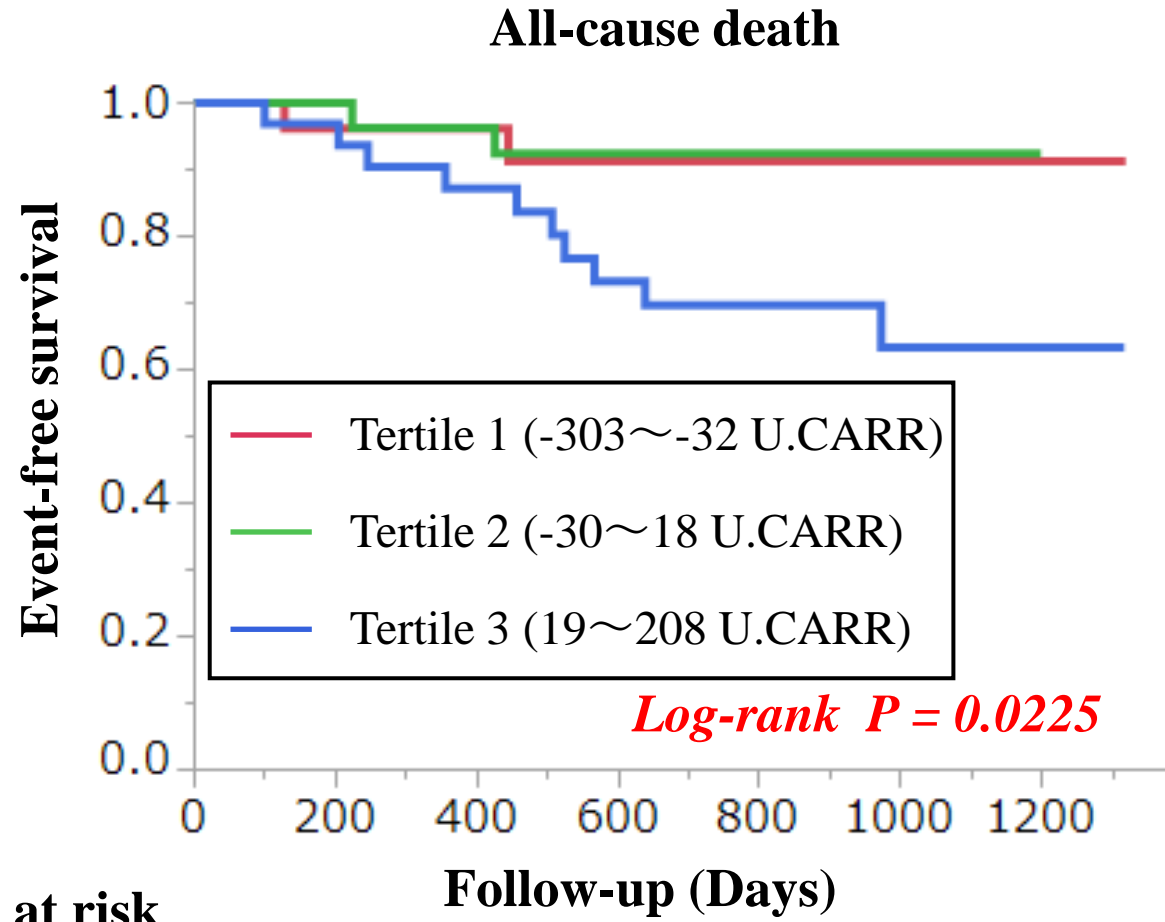

|             | Follow-up (Days) |     |     |     |
|-------------|------------------|-----|-----|-----|
| No. at risk | 0                | 200 | 400 | 600 |
| Tertile 1   | 31               | 23  | 13  | 5   |
| Tertile 2   | 31               | 26  | 15  | 1   |
| Tertile 3   | 32               | 27  | 21  | 5   |

**Fig. S1. Kaplan–Meier curves for all cause death**

Kaplan-Meier analysis revealed that there were many all cause death in the highest  $\Delta d$ -ROM tertile compared to the lower 2 tertiles of  $\Delta d$ -ROM levels (log-rank test  $P = 0.023$ ).
